# Supplementary material for: Multi-stage crystallization mechanism of electroactive phase polyvinylidene fluoride induced by thermal and supercritical carbon dioxide processing
Source: Royal Society of Chemistry journal article supplement (doi:10.1039/c8ce00531a), 2018-01-01
Supplement: c8ce00531a1.pdf [file c8ce00531a1.pdf]

Electronic Supplementary Material (ESI) for CrystEngComm.  
This Journal is © The Royal Society of Chemistry 2018

## Multi-stage crystallization mechanism of electroactive phase polyvinylidene fluoride induced by thermal and supercritical carbon dioxide processing

Ji Eun Lee<sup>a</sup> and Siu Ning Leung<sup>\*a</sup>

<sup>a</sup>Department of Mechanical Engineering, Lassonde School of Engineering, York University, Toronto, ON, Canada M3J 1P3

\*Corresponding author: sunny.leung@lassonde.yorku.ca

### I. Peak to valley height ratio method

If the  $\beta$  band at 1275  $\text{cm}^{-1}$  was present but not the  $\gamma$  band at 1234  $\text{cm}^{-1}$ , Equation (S1) was used. This would denote the 763  $\text{cm}^{-1}$  band as the  $\alpha$  phase and the 840  $\text{cm}^{-1}$  electroactive (EA) band as entirely the  $\beta$  phase.

$$F_{EA} = \frac{A_{EA}}{1.26 * A_{\alpha} + A_{EA}} \times 100\% \quad (S1)$$

where  $F_{EA}$  is the fraction of electroactive crystal phase in PVDF's crystalline region,  $A_{EA}$  and  $A_{\alpha}$  are the absorbance bands of the electroactive and  $\alpha$  phases, respectively.

If both 1275 and 1234  $\text{cm}^{-1}$  bands existed,  $F_{EA}$  would be subdivided into fractions of  $\beta$  and  $\gamma$  crystals. Fig. S1 visualizes the definition of  $\Delta H_{\beta}$  and  $\Delta H_{\gamma}$ , the height difference between the peaks at 1275  $\text{cm}^{-1}$  and 1234  $\text{cm}^{-1}$  to their nearest valleys, respectively. The wavenumbers of the valleys differ depending on the FTIR absorbance curve but they are approximately at 1260 and 1225  $\text{cm}^{-1}$  for  $\Delta H_{\beta}$  and  $\Delta H_{\gamma}$ , respectively. The quantification of the fractions of  $\beta$  and  $\gamma$  crystals can be calculated using Equations (S2) and (S3).

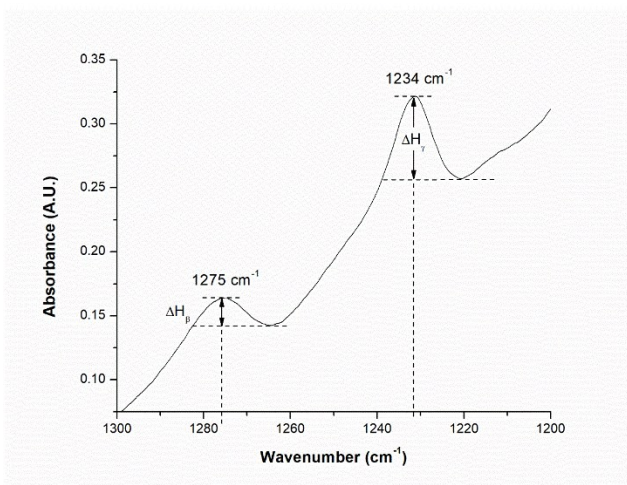

Figure S1. Visual representation of  $\Delta H_{\beta}$  and  $\Delta H_{\gamma}$  for the peak to valley height ratio method

$$F_{\beta} = F_{EA} \times \left( \frac{\Delta H_{\beta}}{\Delta H_{\beta} + \Delta H_{\gamma}} \right) \times 100\% \quad (S2)$$

$$F_{\gamma} = F_{EA} \times \left( \frac{\Delta H_{\gamma}}{\Delta H_{\beta} + \Delta H_{\gamma}} \right) \times 100\% \quad (S3)$$

where  $F_{\beta}$  and  $F_{\gamma}$  are the percentages of the  $\beta$  phase and  $\gamma$  phase, respectively, out of the electroactive crystal phase.

## II. Effect of isothermal crystallization time ( $t_{hold}$ ) on the fractions of $\beta$ and $\gamma$ crystal phases in PVDF samples after the completion of phase P2

The samples were heated to  $T_H$  of 180 °C and held for  $t_{hold}$  of 0, 15, and 300 minutes. After this, the samples were taken out and quenched in an ice bath. Figure S2 illustrates the absence of  $\gamma$  crystals in PVDF processed with no or short  $t_{hold}$  (i.e., 15 min). In contrast,  $\gamma$  crystal was found in the PVDF sample processed with  $t_{hold}$  increased to 300 minutes.

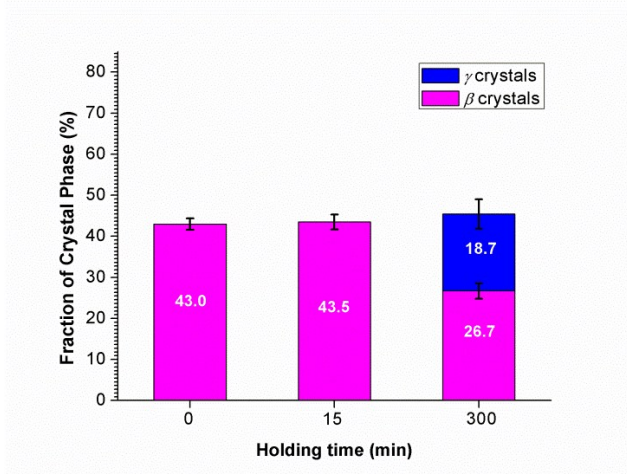

**Figure S2.** Effect of  $t_{hold}$  at  $T_H$  of 180 °C on the fractions of  $\beta$  and  $\gamma$  crystal phases. Processing was completed up until phase P2 and then the PVDF samples were quenched in an ice water bath.

## III. Lack of effect of isothermal crystallization time ( $t_{hold}$ ) on the foam morphologies in PVDF samples

Despite contrasting  $t_{hold}$  values, the foam morphologies of the PVDF samples were virtually invariant, causing steady  $VER$  and  $\beta$  phase contents. Figures S3(a) and (b) illustrate the SEM micrographs of PVDF foams prepared with different  $t_{hold}$ .

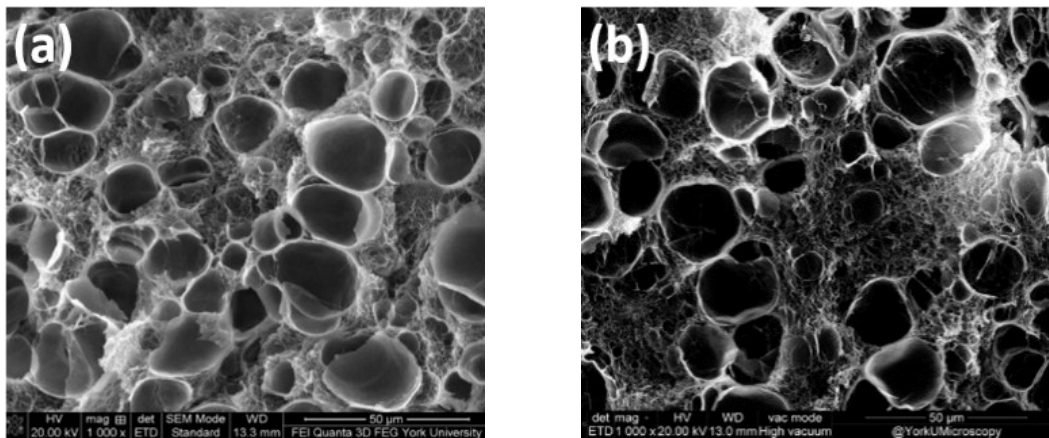

**Figure S3.** SEM micrographs of PVDF samples at 1000x magnification with  $t_{hold}$  of: (a) 0 min; and (b) 1440 mins. [Processing conditions:  $T_H = 180$  °C,  $T_{sat} = 160$  °C,  $P_{sat} = 2000$  psi,  $-dP/dt = 191$  MPa/s].

#### IV. $\alpha$ , $\beta$ , and $\gamma$ crystal contents in PVDF samples after being processed in each of the five processing phases involved in the thermal and ScCO<sub>2</sub> processing

Equations (3) and (S1-S3) were used to determine the  $\alpha$ ,  $\beta$ , and  $\gamma$  crystal contents of the processed PVDF samples after each phase. The processing conditions used are:  $T_H = 180$  °C,  $t_{hold} = 300$  mins,  $T_{sat} = 160$  °C, and  $P_{sat} = 2000$  psi. Each condition used at least three samples to calculate the average polymorph contents and the standard deviations.

**Table S1** Raw data for  $\alpha$ ,  $\beta$ , and  $\gamma$  crystal contents in PVDF samples after each processing phase

| Label                             | Average $\alpha$ content (%) | $\alpha$ Standard deviation (%) | Average $\beta$ content (%) | $\beta$ Standard deviation (%) | Average $\gamma$ content (%) | $\gamma$ Standard deviation (%) |
|-----------------------------------|------------------------------|---------------------------------|-----------------------------|--------------------------------|------------------------------|---------------------------------|
| Non-processed sample              | 35.3                         | 2.9                             | 16.6                        | 0.4                            | 0.0                          | 0.0                             |
| Phase 1                           | 23.9                         | 0.8                             | 18.2                        | 0.7                            | 0.0                          | 0.0                             |
| Phase 2                           | 24.4                         | 1.5                             | 11.5                        | 1.3                            | 8.9                          | 1.9                             |
| Phase 3                           | 20.6                         | 2.2                             | 5.3                         | 2.0                            | 20.8                         | 1.8                             |
| Phase 4 without ScCO <sub>2</sub> | 19.6                         | 2.4                             | 3.6                         | 0.6                            | 23.5                         | 2.4                             |
| Phase 4 with ScCO <sub>2</sub>    | 16.0                         | 1.2                             | 12.8                        | 2.6                            | 17.7                         | 1.8                             |

#### V. Fractions of $\beta$ and $\gamma$ crystal contents and volume expansion ratios with varying heating temperatures, $T_H$

Equations (S1-S3) were used to determine the fraction of  $\beta$  and  $\gamma$  crystal contents and Equation (1) was used to determine the volume expansion ratios (*VER*) of the processed PVDF samples with varying heating temperatures. The processing conditions used are:  $t_{hold} = 0$  min,  $T_{sat} = 160$  °C,  $P_{sat} = 2000$  psi,  $-dP/dt = 191$  MPa/s. Each condition used at least three samples to calculate the average polymorph content and the standard deviations.

**Table S2** Raw data for fractions of  $\beta$  and  $\gamma$  crystal contents and *VER* of PVDF samples processed with various heating temperatures

| Heating Temperature, $T_H$ (°C) | <i>VER</i> | <i>VER</i> Standard deviation | Average $\beta$ content (%) | $\beta$ Standard deviation (%) | Average $\gamma$ content (%) | $\gamma$ Standard deviation (%) |
|---------------------------------|------------|-------------------------------|-----------------------------|--------------------------------|------------------------------|---------------------------------|
| 170                             | 3.3        | 0.3                           | 16.4                        | 1.4                            | 30.6                         | 2.1                             |
| 180                             | 4.4        | 0.4                           | 20.8                        | 1.1                            | 51.4                         | 3.3                             |
| 190                             | 11.6       | 1.8                           | 29.6                        | 1.4                            | 0.0                          | 0.0                             |
| 200                             | 12.0       | 2.1                           | 29.4                        | 1.9                            | 0.0                          | 0.0                             |
| 220                             | 5.6        | 1.2                           | 33.7                        | 1.3                            | 0.0                          | 0.0                             |

## VI. Fraction of $\beta$ and $\gamma$ crystal contents with varying holding times, $t_{hold}$ , processing up to phase 2

Equations (S1-S3) were used to determine the fractions of  $\beta$  and  $\gamma$  crystal contents of PVDF samples processed up to phase 2, with varying holding times at a heating temperature of 180 °C. Each condition used at least three samples to calculate the average polymorph contents and the standard deviations.

**Table S3** Raw data for fractions of  $\beta$  and  $\gamma$  crystal contents of PVDF samples processed up to phase 2 with various holding times

| Holding time, $t_{hold}$<br>(mins) | Average $\beta$<br>content (%) | $\beta$ Standard<br>deviation (%) | Average $\gamma$<br>content (%) | $\gamma$ Standard<br>deviation (%) |
|------------------------------------|--------------------------------|-----------------------------------|---------------------------------|------------------------------------|
| 0                                  | 43.1                           | 1.5                               | 0.0                             | 0.0                                |
| 15                                 | 43.2                           | 1.8                               | 0.0                             | 0.0                                |
| 300                                | 26.7                           | 3.0                               | 18.7                            | 3.8                                |

## VII. $\alpha$ , $\beta$ , and $\gamma$ crystal contents in PVDF polymer with varying holding times, $t_{hold}$

Equations (S1-S3) were used to determine the  $\alpha$ ,  $\beta$ , and  $\gamma$  crystal contents of the processed PVDF samples with varying holding times at a heating temperature of 180 °C. The processing conditions used are:  $T_H = 180$  °C,  $T_{sat} = 160$  °C,  $P_{sat} = 2000$  psi, and  $-dP/dt = 191$  MPa/s. Each condition used at least three samples to calculate the average polymorph contents and the standard deviations.

**Table S4** Raw data for  $\alpha$ ,  $\beta$ , and  $\gamma$  crystal contents in PVDF samples processed with varying holding times

| Holding time, $t_{hold}$<br>(mins) | Average $\alpha$<br>content (%) | $\alpha$ Standard<br>deviation (%) | Average $\beta$<br>content (%) | $\beta$ Standard<br>deviation (%) | Average $\gamma$<br>content (%) | $\gamma$ Standard<br>deviation (%) |
|------------------------------------|---------------------------------|------------------------------------|--------------------------------|-----------------------------------|---------------------------------|------------------------------------|
| 0                                  | 14.5                            | 1.4                                | 10.8                           | 0.5                               | 26.6                            | 1.6                                |
| 15                                 | 13.6                            | 1.3                                | 9.4                            | 1.2                               | 20.6                            | 2.1                                |
| 45                                 | 13.0                            | 1.5                                | 9.3                            | 0.9                               | 20.4                            | 1.0                                |
| 120                                | 13.8                            | 1.6                                | 12.0                           | 0.9                               | 20.5                            | 2.3                                |
| 300                                | 16.0                            | 1.2                                | 12.8                           | 2.6                               | 17.7                            | 1.8                                |
| 1440                               | 17.0                            | 1.2                                | 12.0                           | 2.5                               | 17.3                            | 2.2                                |

### VIII. Fractions of $\beta$ and $\gamma$ crystal contents of PVDF samples processed with varying saturation temperatures, $T_{sat}$

Equations (S1-S3) were used to determine the fractions of  $\beta$  and  $\gamma$  crystal contents of PVDF samples processed with varying saturation temperatures. The processing conditions used are:  $T_H = 180$  °C,  $t_{hold} = 0$  min,  $P_{sat} = 2000$  psi, and  $-dP/dt = 191$  MPa/s. Each condition used at least three samples to calculate the average polymorph contents and the standard deviations.

**Table S5** Raw data for fractions of  $\beta$  and  $\gamma$  crystal contents in PVDF samples processed with various saturation temperatures

| Saturation Temperature, $T_{sat}$ (°C) | Average $\beta$ content (%) | $\beta$ Standard deviation (%) | Average $\gamma$ content (%) | $\gamma$ Standard deviation (%) |
|----------------------------------------|-----------------------------|--------------------------------|------------------------------|---------------------------------|
| 120                                    | 3.9                         | 1.5                            | 65.6                         | 3.1                             |
| 140                                    | 4.9                         | 0.7                            | 61.6                         | 2.1                             |
| 160                                    | 20.8                        | 1.1                            | 51.4                         | 3.3                             |

### IX. Fractions of $\beta$ and $\gamma$ crystal contents and volume expansion ratios of PVDF samples processed with varying saturation pressure, $P_{sat}$

Equations (S1-S3), (1), and (2) were used to determine the fraction of  $\beta$  and  $\gamma$  crystal contents and volume expansion ratios ( $VER$ ) of the processed PVDF samples, respectively, with varying saturation pressures. The processing conditions used are:  $T_H = 180$  °C,  $t_{hold} = 0$  min,  $T_{sat} = 160$  °C, and  $-dP/dt = 191$  MPa/s. Each condition used at least three samples to calculate the average polymorph contents and the standard deviations.

**Table S6** Raw data for fractions of  $\beta$  and  $\gamma$  crystal contents,  $VER$ , and average cell diameter for various saturation pressures

| Saturation Pressure, $P_{sat}$ (psi) | $VER$ | $VER$ Standard deviation | Average $\beta$ content (%) | $\beta$ Standard deviation (%) | Average $\gamma$ content (%) | $\gamma$ Standard deviation (%) |
|--------------------------------------|-------|--------------------------|-----------------------------|--------------------------------|------------------------------|---------------------------------|
| 1200                                 | 2.3   | 0.1                      | 8.2                         | 2.4                            | 63.3                         | 1.9                             |
| 2000                                 | 4.4   | 0.4                      | 20.8                        | 1.1                            | 51.4                         | 3.3                             |
| 2500                                 | 9.3   | 1.3                      | 28.5                        | 2.7                            | 37.0                         | 3.5                             |

## X. Fractions of $\beta$ and $\gamma$ crystal contents and volume expansion ratio of PVDF samples processed with varying pressure drop rates, $-dP/dt$

Equations (S1-S3) were used to determine the fractions of  $\beta$  and  $\gamma$  crystal contents and equation (1) was used to determine the volume expansion ratios ( $VER$ ) of the PVDF samples processed with varying pressure drop rates. The processing conditions used are:  $T_H = 180$  °C,  $t_{hold} = 0$  min,  $T_{sat} = 160$  °C, and  $P_{sat} = 2000$  psi. Each condition used at least three samples to calculate the average polymorph contents and the standard deviations.

**Table S7** Raw data for fractions of  $\beta$  and  $\gamma$  crystal contents and  $VER$  in PVDF samples processed in various pressure drop rates

| Pressure drop rate,<br>$-dP/dt$ (MPa/s) | $VER$ | $VER$ Standard<br>deviation | Average $\beta$<br>content (%) | $\beta$ Standard<br>deviation (%) | Average $\gamma$<br>content (%) | $\gamma$ Standard<br>deviation (%) |
|-----------------------------------------|-------|-----------------------------|--------------------------------|-----------------------------------|---------------------------------|------------------------------------|
| 48                                      | 1.8   | 0.2                         | 8.8                            | 1.7                               | 57.0                            | 2.5                                |
| 55                                      | 2.9   | 0.4                         | 12.3                           | 2.3                               | 60.0                            | 2.0                                |
| 123                                     | 3.9   | 1.5                         | 21.3                           | 2.1                               | 50.5                            | 2.5                                |
| 164                                     | 4.1   | 0.1                         | 19.3                           | 1.9                               | 51.5                            | 2.6                                |
| 191                                     | 4.4   | 0.4                         | 20.8                           | 1.1                               | 51.4                            | 3.3                                |

## XI. Fractions of $\beta$ and $\gamma$ crystal contents and volume expansion ratios of processed PVDF samples processed using two different processing conditions

Equations (S1-3), (1), and (2) were used to determine the fractions of  $\beta$  and  $\gamma$  crystal contents and volume expansion ratios ( $VER$ ) of PVDF samples, respectively, processed with the following 2 processing conditions.

**Condition 1.**  $T_H = 180$  °C,  $t_{hold} = 0$  min,  $T_{sat} = 160$  °C,  $P_{sat} = 2000$  psi.

**Condition 2.**  $T_H = 220$  °C,  $t_{hold} = 0$  min,  $T_{sat} = 160$  °C,  $P_{sat} = 2500$  psi.

Each condition used at least three samples to calculate the average polymorph contents and the standard deviations.

**Table S8** Raw data for fraction of  $\beta$  and  $\gamma$  crystal content, and  $VER$  in PVDF samples processed with different processing conditions

| Condition | $VER$ | $VER$ Standard<br>deviation | Average $\beta$<br>content (%) | $\beta$ Standard<br>deviation (%) | Average $\gamma$<br>content (%) | $\gamma$ Standard<br>dDeviation (%) |
|-----------|-------|-----------------------------|--------------------------------|-----------------------------------|---------------------------------|-------------------------------------|
| 1         | 4.4   | 0.4                         | 20.8                           | 1.1                               | 51.4                            | 3.3                                 |
| 2         | 4.8   | 0.1                         | 30.1                           | 1.8                               | 0                               | 0                                   |

## XII. Fractions of $\beta$ and $\gamma$ crystal content and volume expansion ratios of PVDF samples prepared using uniaxial mechanical stretching

Equations (S1) was used to determine the  $\alpha$ ,  $\beta$ , and  $\gamma$  crystal contents of the PVDF samples processed by uniaxial mechanical stretching. Each condition used at least three samples to calculate the average polymorph contents and the standard deviations.

**Table S9** Raw data for  $\alpha$ ,  $\beta$ , and  $\gamma$  crystal contents in PVDF polymer processed by uniaxial mechanical stretching

| Stretch ratio (%) | Stretching Temperature (°C) | Stretching speed (mm/s) | Thickness ( $\mu\text{m}$ ) | Average $\beta$ content (%) | $\beta$ Standard deviation (%) |
|-------------------|-----------------------------|-------------------------|-----------------------------|-----------------------------|--------------------------------|
| 0                 | 90                          | 0.1                     | 100                         | 31.0                        | 0.88                           |
| 200               | 90                          | 0.1                     | 100                         | 37.4                        | 2.0                            |
| 300               | 90                          | 0.1                     | 100                         | 68.4                        | 1.9                            |

## XIII. Dielectric constants of PVDF solid and foam samples with different volume expansion ratios

The dielectric constants (at 100,000 Hz) of the as molded PVDF sample and PVDF foam samples with different volume expansion ratios were measured and the data are summarized in Table S10.

**Table S10** Crystal contents and dielectric constants of as-molded PVDF samples and PVDF foams with maximum fractions of  $\beta$ ,  $\gamma$ , and electroactive phases

| $T_H$ (°C) | $T_{sat}$ (°C) | $P_{sat}$ (psi) | $\beta$ phase (%) | $\gamma$ phase (%) | Electroactive phase (%) | Volume Expansion Ratio | Dielectric Constant |
|------------|----------------|-----------------|-------------------|--------------------|-------------------------|------------------------|---------------------|
| 220        | 160            | 2000            | <b>33.7 ± 1.3</b> | -                  | 33.7                    | 5.6                    | 2.0                 |
| 180        | 120            | 2000            | 3.9               | <b>65.6 ± 3.2</b>  | 69.5                    | 4.4                    | 8.7                 |
| 180        | 160            | 2000            | 20.8              | 51.4               | <b>72.2 ± 2.9</b>       | 1.0                    | 2.2                 |
|            | As-molded PVDF |                 | 32.0              | 0                  | <b>32.0</b>             | 1.0                    | 8.2                 |
